# Supplementary material for: Metabolite/phytohormone–gene regulatory networks in soybean organs under dehydration conditions revealed by integration analysis
Source: PubMed Central journal article supplement — Plant J. 2020 May 3;103(1):197–211. doi: 10.1111/tpj.14719 (PMC7384127; doi:10.1111/tpj.14719), 2020-05-03
Supplement: TPJ-103-197-s001.pdf [file TPJ-103-197-s001.pdf]

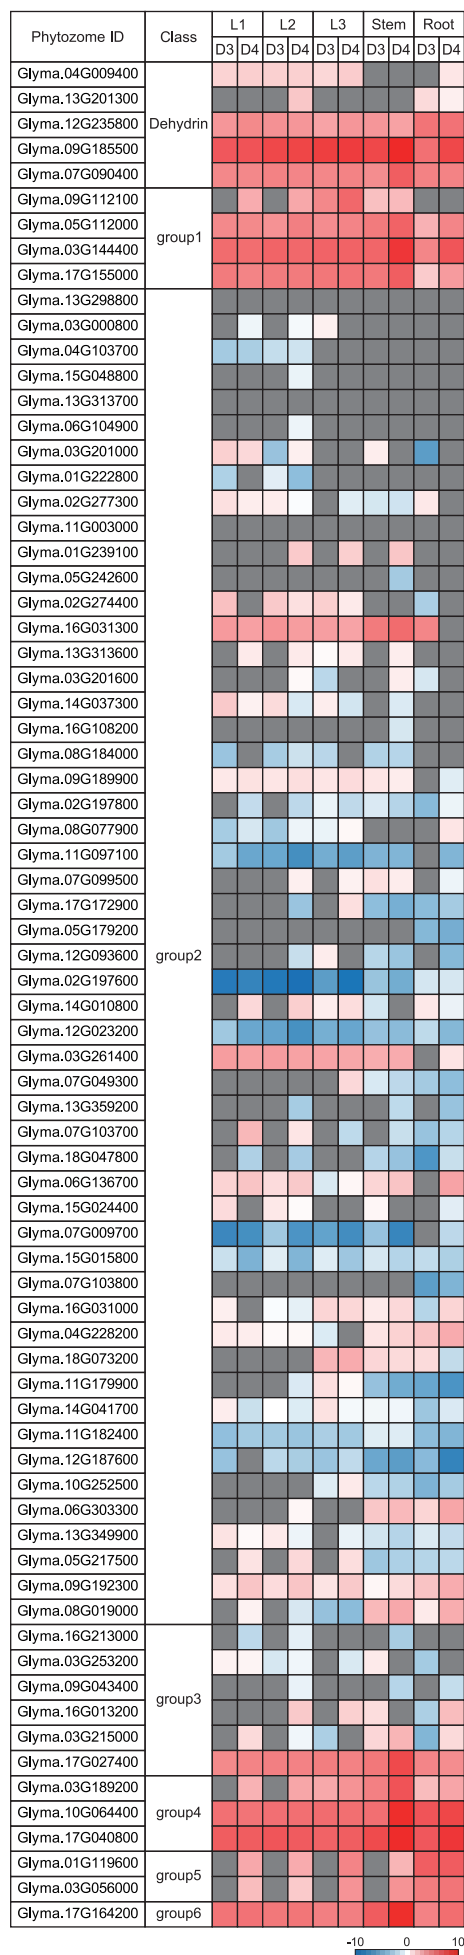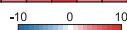

**Figure S1.** Expression of genes encoding dehydrin/LEA proteins. Heatmap showing the log ratios of dehydration-responsive genes in representative molecular classes of dehydrin/LEA proteins. Transcript levels of genes encoding dehydrin/LEA proteins were measured in various soybean organs (1st [L1], 2nd [L2], and 3rd trifoliolate leaves [L3]; stems; and roots) subjected to four treatments: dehydration (water withheld) for 3 (D3) or 4 (D4) days or untreated for 3 (U3) or 4 (U4) days. Each square indicates the level of gene expression. The heatmap shows transcript levels of genes encoding dehydrin (Dehydrin), group 1 LEA proteins (group 1), group 2 LEA proteins (group 2), group 3 LEA proteins (group 3), group 4 LEA proteins (group 4), group 5 LEA proteins (group 5), and a group 6 LEA protein (group 6) in dehydration-exposed soybean plants in terms of fold change relative to that of the corresponding control that was untreated for 3 or 4 days, as shown in the scale. Grey squares indicate no significant differences in expression.
