# Supplementary material for: Metabolite/phytohormone–gene regulatory networks in soybean organs under dehydration conditions revealed by integration analysis
Source: PubMed Central journal article supplement — Plant J. 2020 May 3;103(1):197–211. doi: 10.1111/tpj.14719 (PMC7384127; doi:10.1111/tpj.14719), 2020-05-03
Supplement: TPJ-103-197-s004.pdf [file TPJ-103-197-s004.pdf]

PeIMT1 ATGACGACCTACACCAATGGCAACTACACACAACCAAAAACCCCTAGSCAAAGATGAACAATTAGCTGGTTTGGCAGTGACATTAGCAAATGCAGCTGCTT : 100  
 McIMT1 ATGACGACCTACACCAATGGCAACTACACACAACCAAAAACCCCTAGSCAAAGATGAACAATTAGCTGGTTTGGCAGTGACATTAGCAAATGCAGCTGCTT : 100

PeIMT1 TTCCAATGATCCTGAAATCAGCCTTTGAGCTAAAAATCCTTGACATATTCTCAAAGCAGGGGAAGGCGTGTTTGTATCGACTTCTGAGATCGCTAGCCA : 200  
 McIMT1 TTCCAATGATCCTGAAATCAGCCTTTGAGCTAAAAATCCTTGACATATTCTCAAAGCAGGGGAAGGCGTGTTTGTATCGACTTCTGAGATCGCTAGCCA : 200

PeIMT1 AATCGGGCAAAAGAACCCCTAATGCCCCGGTGTGTGGACCCGGATGCTCCGGCTCCTGGCTAGCCACTCTGTGTTAACATGCAAGCTCCAAAAGGGTGAG : 300  
 McIMT1 AATCGGGCAAAAGAACCCCTAATGCCCCGGTGTGTGGACCCGGATGCTCCGGCTCCTGGCTAGCCACTCTGTGTTAACATGCAAGCTCCAAAAGGGTGAG : 300

PeIMT1 GGTGGTCTCAAAGGGTGTATGGTCCAGCTCCCCTTTGCAACTATCTTGCTAGTAAATGATGGTCAAGGCTCTCTGGCCCTTTGCTTGTGTTTGCATCATG : 400  
 McIMT1 GGTGGTCTCAAAGGGTGTATGGTCCAGCTCCCCTTTGCAACTATCTTGCTAGTAAATGATGGTCAAGGCTCTCTGGCCCTTTGCTTGTGTTTGCATCATG : 400

PeIMT1 ACAAGGTCATGATGGAGAGTGGTTCCTTCACTTGAATGATTACATACTAGAAGGAGGTGTTCCATTCAAGCGCGCTCATGGGATGATCCAATTCGACTACAC : 500  
 McIMT1 ACAAGGTCATGATGGAGAGTGGTTCCTTCACTTGAATGATTACATACTAGAAGGAGGTGTTCCATTCAAGCGCGCTCATGGGATGATCCAATTCGACTACAC : 500

PeIMT1 TGGGACTGATGAAAGGTTCAATCATGTGTCAACCAAGGGATGGCACACCACACTATCCTGGTCATGAAGAAGCTCCTTGACAACACTACAATGGGTTTAAAT : 600  
 McIMT1 TGGGACTGATGAAAGGTTCAATCATGTGTCAACCAAGGGATGGCACACCACACTATCCTGGTCATGAAGAAGCTCCTTGACAACACTACAATGGGTTTAAAT : 600

PeIMT1 GATGTCAAGGTCCTAGTGTGATGTGGGTGGTAAACATGGTGTCAATGTGAGCATGATCGTCGCTAAGCATACTCACATTAAGGGCATCAACTATGACTTGC : 700  
 McIMT1 GATGTCAAGGTCCTAGTGTGATGTGGGTGGTAAACATGGTGTCAATGTGAGCATGATCGTCGCTAAGCATACTCACATTAAGGGCATCAACTATGACTTGC : 700

PeIMT1 CTCATGTCTTGGTGTGCTCCTTCTTACCCCGGTGTGGAGCATGTGGTGGTAAACATGTTTGGAGGCATACCACAAGCAGATGCCATTTTCATGAAGTG : 800  
 McIMT1 CTCATGTCTTGGTGTGCTCCTTCTTACCCCGGTGTGGAGCATGTGGTGGTAAACATGTTTGGAGGCATACCACAAGCAGATGCCATTTTCATGAAGTG : 800

PeIMT1 GGTGTTGCATGATGGAGCGACGAGCATTGCGTGAAGATACTCAACAAGTGCTATGAGAGCCTGGCAAGGGGAGGAAGATCATCCTTGTGGAATCGCTT : 900  
 McIMT1 GGTGTTGCATGATGGAGCGACGAGCATTGCGTGAAGATACTCAACAAGTGCTATGAGAGCCTGGCAAGGGGAGGAAGATCATCCTTGTGGAATCGCTT : 900

PeIMT1 ATACCAGTAATCCCAGAAGACAACCTCGAATCACACATGGTGTTAGCCTTGATTGCCACACTTTGGTGCACAACCAAGGTGGAAAAGAGAGATCAAAGG : 1000  
 McIMT1 ATACCAGTAATCCCAGAAGACAACCTCGAATCACACATGGTGTTAGCCTTGATTGCCACACTTTGGTGCACAACCAAGGTGGAAAAGAGAGATCAAAGG : 1000

PeIMT1 AGGATTTTGAAGCCTTAGCTTCCAAGACTGGCTTCTCTACAGTTGATGTCATTTGCTGTGCCTATGACACTTGGGTGATGGAGCTCTACAAGAAG : 1095  
 McIMT1 AGGATTTTGAAGCCTTAGCTTCCAAGACTGGCTTCTCTACAGTTGATGTCATTTGCTGTGCCTATGACACTTGGGTGATGGAGCTCTACAAGAAG : 1095

**Figure S4.** Nucleotide sequences of PeIMT1 and McIMT1. The nucleotide sequences were aligned using ClustalX, and the resulting alignment was shaded and modified using drawing software.
