# Supplementary material for: Metabolite/phytohormone–gene regulatory networks in soybean organs under dehydration conditions revealed by integration analysis
Source: PubMed Central journal article supplement — Plant J. 2020 May 3;103(1):197–211. doi: 10.1111/tpj.14719 (PMC7384127; doi:10.1111/tpj.14719), 2020-05-03
Supplement: TPJ-103-197-s005.pdf [file TPJ-103-197-s005.pdf]

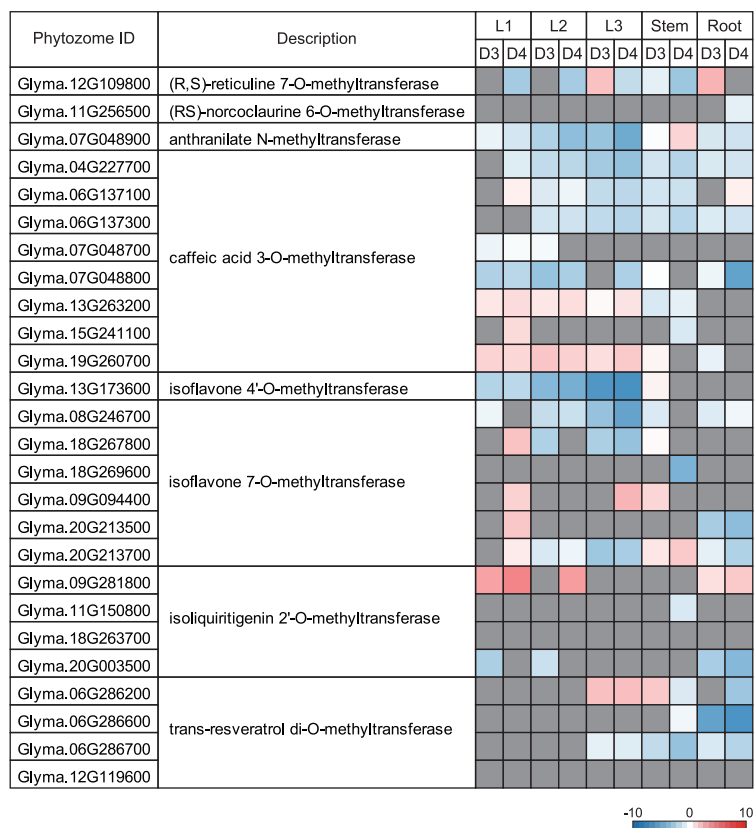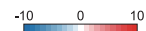

**Figure S5.** Expression of genes encoding SAM-MTases. Heatmap showing the log ratios of dehydration-responsive genes encoding SAM-MTases. Soybean organs and treatments are shown in Figure 1. Each square indicates the level of gene expression. Grey squares indicate no significant differences in expression.
