# Supplementary material for: Metabolite/phytohormone–gene regulatory networks in soybean organs under dehydration conditions revealed by integration analysis
Source: PubMed Central journal article supplement — Plant J. 2020 May 3;103(1):197–211. doi: 10.1111/tpj.14719 (PMC7384127; doi:10.1111/tpj.14719), 2020-05-03
Supplement: TPJ-103-197-s006.pdf [file TPJ-103-197-s006.pdf]

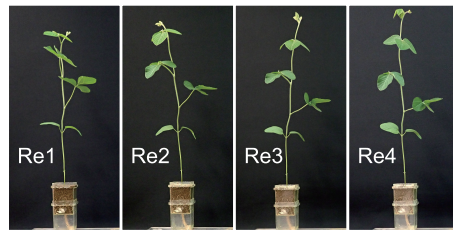

**Figure S6.** Soybean seedlings 1 day (Re1), 2 days (Re2), 3 days (Re3) and 4 days (Re4) after rehydration treatment. Soybean seedlings were subjected to dehydration treatment by withholding watering. After that, they recovered by rehydration treatment.
